# Supplementary material
Source: publisher figshare collection journal article supplement (https://springernature.figshare.com/ndownloader/files/21929169)
Supplement: Supplementary file [file 21929169]

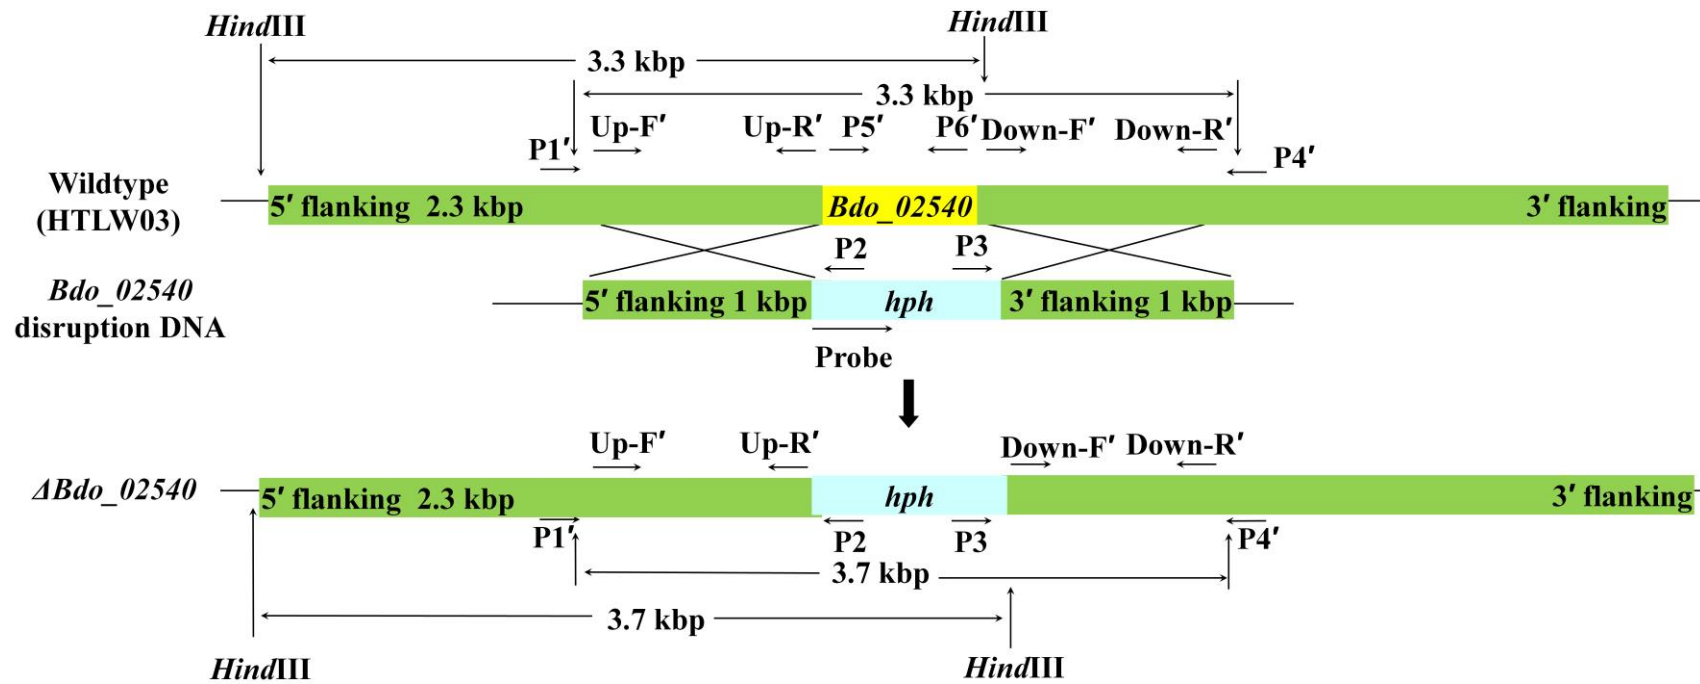

**Fig. S3** Genomic details regarding *Bdo\_02540*

Arrows represent the primers used for constructing the plasmid and for verifying the transformants by PCR. The restriction enzyme digestion sites are indicated.
